# Supplementary material
Source: PubMed Central journal article supplement (PMC10148461)
Supplement: 13017_2023_499_MOESM2_ESM.pdf [file 13017_2023_499_MOESM2_ESM.pdf]

|                                            |                                                    | I ROUND<br>DELPHI                      |      |                                   |      | Total |                 |
|--------------------------------------------|----------------------------------------------------|----------------------------------------|------|-----------------------------------|------|-------|-----------------|
| COLOR CODE                                 | Surgical<br>disease/<br>conditions                 | Likert scale 4 (near<br>totally agree) | %    | Likert scale 5<br>(totally agree) | %    |       | Decision        |
| <b>RED CODE-<br/>immediate<br/>surgery</b> | <b>blunt and<br/>penetrating<br/>trauma</b>        | 4/35                                   | 11.4 | 29/35                             | 82.9 | >90   | <b>included</b> |
|                                            | <b>postoperative<br/>hemorrhage</b>                | 5/35                                   | 14.3 | 27/35                             | 77.1 | >90   | <b>included</b> |
|                                            | <b>GI bleeding<br/>(endoscopic<br/>hemostasis)</b> | 11/35                                  | 31.4 | 18/35                             | 51.4 | 82.8  | <b>included</b> |
|                                            | Hemorrhagic<br>corpus luteum                       | 7/35                                   | 20   | 16/35                             | 45.7 | 65.7  | <b>II</b>       |
|                                            | <b>ruptured<br/>aortic<br/>aneurysm</b>            | 4/35                                   | 11.4 | 30/35                             | 85.7 | >90   | <b>included</b> |
|                                            | <b>Tension<br/>pneumothorax</b>                    | 7/35                                   | 20   | 25/35                             | 71.4 | >90   | <b>included</b> |

|  |                                                   |       |      |       |      |      |                 |
|--|---------------------------------------------------|-------|------|-------|------|------|-----------------|
|  | <b>Post partum hemorrhage</b>                     | 5/35  | 14.3 | 27/35 | 77.1 | >90  | <b>Included</b> |
|  | <b>Extra-uterine pregnancy</b>                    | 6/35  | 17.1 | 24/35 | 68.6 | 85.7 | <b>Included</b> |
|  | <b>Pelvic trauma stabilisation</b>                | 9/35  | 25.7 | 18/35 | 51.4 | 77.1 | <b>Included</b> |
|  | <b>Major vascular lesions</b>                     | 2/35  | 5.7  | 30/35 | 85.7 | >90  | <b>Included</b> |
|  | Tracheostomy                                      | 7/35  | 20   | 21/35 | 60   | 80   | <b>?</b>        |
|  | <b>Aortic dissection type A</b>                   | 6/35  | 17.1 | 22/35 | 62.9 | 80   | <b>Included</b> |
|  | <b>Any cranial conditions with risk of coning</b> | 8/35  | 22.9 | 23/35 | 65.7 | 88.6 | <b>Included</b> |
|  | <b>Acute Extradural hematoma</b>                  | 8/35  | 22.9 | 24/35 | 68.6 | >90  | <b>Included</b> |
|  | <b>Cesarean section</b>                           | 10/35 | 28.6 | 17/35 | 48.6 | >90  | <b>Included</b> |

|                                                  |                                                                                      |       |      |       |      |      |                 |
|--------------------------------------------------|--------------------------------------------------------------------------------------|-------|------|-------|------|------|-----------------|
| <b>ORANGE<br/>CODE-surgery<br/>within 1 hour</b> | <b>acute mesenteric ischemia</b>                                                     | 7/35  | 20   | 25/35 | 71.4 | >90  | <b>included</b> |
|                                                  | <b>Incarcerated/<br/>strangulated<br/>hernia</b>                                     | 13/35 | 37.1 | 14/35 | 40   | 77.1 | <b>Included</b> |
|                                                  | <b>acute limbs<br/>ischemia</b>                                                      | 7/35  | 20   | 25/35 | 71.4 | >90  | <b>included</b> |
|                                                  | <b>graft<br/>thrombosis</b>                                                          | 11/35 | 31.4 | 17/35 | 48.6 | 80   | <b>included</b> |
|                                                  | <b>testicular<br/>torsion</b>                                                        | 7/35  | 20   | 25/35 | 71.4 | >90  | <b>included</b> |
|                                                  | ovarian torsion                                                                      | 9/35  | 25.7 | 17/35 | 48.6 | 74.3 | <b>II ?</b>     |
|                                                  | <b>rupture of<br/>corpus<br/>cavernosum</b>                                          | 15/35 | 42.9 | 12/35 | 34.3 | 77.2 | <b>Included</b> |
|                                                  | <b>Penetrating<br/>trauma in<br/>stable patient<br/>(exploratory<br/>laparotomy)</b> | 15/35 | 42.9 | 13/35 | 37.1 | 80   | <b>Included</b> |

|                            |                                               |       |      |       |      |      |                        |
|----------------------------|-----------------------------------------------|-------|------|-------|------|------|------------------------|
|                            | Embolization in stable trauma patient         | 12/35 | 34.3 | 14/35 | 40   | 74.3 | ?                      |
|                            | <b>retained placenta with acute bleeding</b>  | 10/35 | 28.6 | 17/35 | 48.6 | 77.2 | <b>included</b>        |
|                            | Acute methrorrage                             | 12/35 | 34.3 | 10/35 | 28.6 | 62.9 | <b>II</b>              |
|                            | Macrohematuria                                | 7/35  | 20   | 5/35  | 14.3 | 34.3 | <b>EXCLUDED &lt;50</b> |
| Patients with septic shock | <b>GI perforation</b>                         | 8/35  | 22.9 | 21/35 | 60   | 82.9 | <b>included</b>        |
|                            | Infected necrotizing haemorrhage pancreatitis | 7/35  | 20   | 13/35 | 37.1 | 57.1 | <b>II ?</b>            |
|                            | Urolithiasis with septic shock                | 10/35 | 28.6 | 11/35 | 31.4 | 60   | <b>II</b>              |
|                            | <b>Fournier's gangrene</b>                    | 10/35 | 28.6 | 22/35 | 62.9 | >90  | <b>included</b>        |
|                            | <b>toxic megacolon</b>                        | 10/35 | 28.6 | 21/35 | 60   | 88.6 | <b>included</b>        |

|                                                                  |       |      |       |      |      |                 |
|------------------------------------------------------------------|-------|------|-------|------|------|-----------------|
| <b>anastomotic fistula with septic shock/diffuse peritonitis</b> | 10/35 | 28.6 | 17/35 | 48.6 | 77.2 | <b>included</b> |
| <b>necrotizing fasciitis</b>                                     | 7/35  | 20   | 24/35 | 68.6 | 88.6 | <b>included</b> |
| ruptured tubo-ovarian abscess                                    | 12/35 | 34.3 | 10/35 | 28.6 | 62.9 | <b>II</b>       |
| Intraperitoneal bladder rupture                                  | 6/35  | 17.1 | 13/35 | 37.1 | 54.2 | <b>II</b>       |
| Bowel obstruction (systemic disease)                             | 13/35 | 37.1 | 13/35 | 37.1 | 74.2 | <b>II</b>       |
| Retrobulbar hematoma                                             | 9/35  | 25.7 | 17/35 | 48.6 | 74.3 | <b>II</b>       |
| Subdural hematoma                                                | 6/35  | 17.1 | 18/35 | 51.4 | 68.5 | <b>II</b>       |
| Intracerebral hematoma                                           | 9/35  | 25.7 | 15/35 | 42.9 | 68.6 | <b>II</b>       |

|                                      |                                                                             |       |      |       |      |      |                 |
|--------------------------------------|-----------------------------------------------------------------------------|-------|------|-------|------|------|-----------------|
|                                      | <b>Foreign GI bodies with complete obstruction or batteries (endoscopy)</b> | 13/35 | 37.1 | 14/35 | 40   | 77.1 | <b>Included</b> |
| Other conditions                     | <b>compartment syndrome (any districts)</b>                                 | 6/35  | 17.1 | 26/35 | 74.3 | >90  | <b>Included</b> |
|                                      | <b>heart lung transplants</b>                                               | 6/35  | 17.1 | 23/35 | 65.7 | 82.8 | <b>included</b> |
| <b>YELLOW-surgery within 3/6 hrs</b> | <b>contaminated open fracture</b>                                           | 9/35  | 25.7 | 19/35 | 54.3 | 77.2 | <b>Included</b> |
|                                      | Appendicitis with localised peritonitis/ sepsis                             | 8/35  | 22.9 | 18/35 | 51.4 | 74.3 | <b>II</b>       |
|                                      | Cholecystitis (localised peritonitis/ sepsis)                               | 9/35  | 25.7 | 14/35 | 40   | 65.7 | <b>II</b>       |

|                                                                        |       |      |       |      |      |                 |
|------------------------------------------------------------------------|-------|------|-------|------|------|-----------------|
| Necrotising hemorrhagic pancreatitis with sepsis/localized peritonitis | 9/35  | 25.7 | 11/35 | 31.4 | 57.1 | <b>II</b>       |
| Perianal abscess with sepsis                                           | 12/35 | 34.3 | 10/35 | 28.6 | 62.9 | <b>II</b>       |
| Diverticulitis with sepsis/localized peritonitis                       | 14/35 | 40   | 11/35 | 31.4 | 71.4 | <b>II</b>       |
| <b>spinal cord compression with cauda equina syndrome</b>              | 15/35 | 42.9 | 16/35 | 45.7 | 88.6 | <b>Included</b> |
| <b>increasing intracranial pressure</b>                                | 16/35 | 45.7 | 15/35 | 42.9 | 88.6 | <b>Included</b> |
| <b>anastomotic fistula with septic shock/diffuse peritonitis</b>       | 17/35 | 48.6 | 10/35 | 28.6 | 77.6 | <b>Included</b> |

|                                    |                                               |       |      |       |      |      |                 |
|------------------------------------|-----------------------------------------------|-------|------|-------|------|------|-----------------|
| Other conditions                   | <b>Pneumothorax</b>                           | 14/35 | 40   | 16/35 | 45.7 | 85.7 | <b>Included</b> |
|                                    | <b>Bowel obstruction</b>                      | 17/35 | 48.6 | 11/35 | 31.4 | 80   | <b>Included</b> |
|                                    | Urolithiasis                                  | 13/35 | 37.1 | 12/35 | 34.3 | 71.4 | <b>II</b>       |
|                                    | Incomplete abortion with sepsis               | 14/35 | 40   | 12/35 | 34.3 | 74.3 | <b>II</b>       |
|                                    | <b>liver transplants</b>                      | 9/35  | 25.7 | 19/35 | 54.3 |      | <b>included</b> |
|                                    | Embolization of post-traumatic pseudoaneurysm | 11/35 | 31.4 | 14/35 | 40   | 71.4 | <b>II</b>       |
| <b>GREEN-surgery within 12 hrs</b> | bowel obstruction                             | 6/35  | 17.1 | 16/35 | 45.7 | 62.8 | <b>II</b>       |
|                                    | Perianal abscess                              | 12/35 | 34.3 | 13/35 | 37.1 | 71.4 | <b>II</b>       |
|                                    | Cholecystitis                                 | 8/35  | 22.9 | 12/35 | 34.3 | 57.2 | <b>II</b>       |



|                                       |       |      |       |      |      |                 |
|---------------------------------------|-------|------|-------|------|------|-----------------|
| appendicitis                          | 10/35 | 28.6 | 16/35 | 45.7 | 74.3 | <b>II</b>       |
| <b>Thoracic empyema</b>               | 14/35 | 40   | 13/35 | 37.1 | 77.1 | <b>included</b> |
| incarcerated hernia with obstruction  | 7/35  | 20   | 14/35 | 40   | 60   | <b>II</b>       |
| Urinary fistula                       | 8/35  | 22.9 | 8/35  | 22.9 | 45.8 | <b>II</b>       |
| Hydronephrosis (stent placement)      | 10/35 | 28.6 | 12/35 | 34.3 | 62.9 | <b>II</b>       |
| Urolithiasis with acute kidney injury | 10/35 | 28.6 | 12/35 | 34.3 | 62.9 | <b>II</b>       |
| kidney and pancreatic transplant      | 10/35 | 28.6 | 15/35 | 42.9 | 71.5 | <b>II</b>       |
| foreign body without obstruction      | 11/35 | 31.4 | 13/35 | 37.1 | 68.5 | <b>II</b>       |

|                                          |                                                                                   |       |      |       |      |      |                 |
|------------------------------------------|-----------------------------------------------------------------------------------|-------|------|-------|------|------|-----------------|
| <b>BLUE CODE-surgery within 24-48hrs</b> | <b>2nd look laparotomy</b>                                                        | 8/35  | 22.9 | 22/35 | 62.9 | 85.8 | <b>included</b> |
|                                          | <b>cholecystectomy after ERCP for stones migration or recurrent biliary colic</b> | 9/35  | 25.7 | 18/35 | 51.4 | 77.1 | <b>included</b> |
|                                          | Uncomplicated appendicitis                                                        | 7/35  | 20   | 16/35 | 45.7 | 65.7 | <b>II</b>       |
|                                          | Amputation for osteomyelitis                                                      | 12/35 | 34.3 | 11/35 | 31.4 | 65.7 | <b>II</b>       |
|                                          | A-V fistulae for hemodialysis                                                     | 9/35  | 25.7 | 11/35 | 31.4 | 57.1 | <b>II</b>       |
|                                          | Symptomatic carotid artery stenosis, TIA, STROKE in evolution                     | 9/35  | 25.7 | 13/35 | 37.1 | 62.8 | <b>II</b>       |

|                                              |                                                 |       |      |       |      |      |                  |
|----------------------------------------------|-------------------------------------------------|-------|------|-------|------|------|------------------|
|                                              | Symptomatic AAA after medical treatment failure | 9/35  | 25.7 | 15/35 | 42.9 | 68.6 | II               |
|                                              | Symptomatic aortic dissection type B            | 9/35  | 25.7 | 16/35 | 45.7 | 71.4 | II               |
|                                              | Bones fracture                                  | 11/35 | 31.4 | 13/35 | 37.1 | 68.5 | II               |
|                                              | pelvic trauma fixation                          | 15/35 | 42.9 | 10/35 | 28.6 | 71.5 | II               |
|                                              | Maxillofacial fractures                         | 9/35  | 25.7 | 15/35 | 42.9 | 68.6 | II               |
|                                              | Urolithiasis                                    | 13/35 | 37.1 | 9/35  | 25.7 | 62.8 | II               |
| <b>WHITE CODE-<br/>ORGANIZATIVE<br/>NEED</b> | Elective postponed interventions                | 10/35 | 28.6 | 13/35 | 37.1 | 65.7 | II               |
|                                              | diagnostic biopsy/<br>laparoscopy               | 11/35 | 31.4 | 11/35 | 31.4 | 62.8 | II               |
|                                              | PEG placement (endoscopy)                       | 9/35  | 25.7 | 10/35 | 28.6 | 54.3 | <b>Cancelled</b> |
