# Supplementary material
Source: PubMed Central journal article supplement (PMC10148461)
Supplement: 13017_2023_499_MOESM4_ESM.pdf [file 13017_2023_499_MOESM4_ESM.pdf]

| III ROUND DELPHI                                                                                                                        |                                                              |                                     |             |                                |             |                                     |                 |
|-----------------------------------------------------------------------------------------------------------------------------------------|--------------------------------------------------------------|-------------------------------------|-------------|--------------------------------|-------------|-------------------------------------|-----------------|
| COLOR CODE CLASS                                                                                                                        | SURGICAL DISEASE                                             | Likert scale 4 (near totally agree) | %           | Likert scale 5 (totally agree) | %           | Reached Consensus Agreement (>=75%) | Decision        |
| <b>RED class-Immediate - unstable patient</b>                                                                                           | Gynecological bleeding with unstable patient                 | 6/43                                | <b>14</b>   | 35/43                          | <b>81.4</b> | Y                                   | <b>Included</b> |
| <b>ORANGE class-Within 1 hour from diagnosis-</b> but as soon as possible, patient stable after target resuscitation but at risk of MOF | Acute bleeding non amenable of angio-embolization            | 16/43                               | <b>37.2</b> | 24/43                          | <b>55.8</b> | Y                                   | <b>Included</b> |
|                                                                                                                                         | Ovarian torsion with unstable patient                        | 19/43                               | <b>44.2</b> | 13/43                          | <b>30.2</b> | N                                   | IV round        |
|                                                                                                                                         | Strangulated (groin, incisional, ventral) hernia             | 12/43                               | <b>27.9</b> | 18/43                          | <b>41.9</b> | N                                   | IV round        |
|                                                                                                                                         | Gynecological bleeding in stable patient after resuscitation | 19/43                               | <b>44.2</b> | 10/43                          | <b>23.3</b> | N                                   | IV round        |
|                                                                                                                                         | Ruptured tubo-ovarian abscess with septic shock              | 16/43                               | <b>37.2</b> | 15/43                          | <b>34.9</b> | N                                   | IV round        |

|                                                                                           |                                                                                                                                                                            |       |             |       |             |   |                               |
|-------------------------------------------------------------------------------------------|----------------------------------------------------------------------------------------------------------------------------------------------------------------------------|-------|-------------|-------|-------------|---|-------------------------------|
|                                                                                           | <b>Complicated appendicitis (necrotic, appendicular abscess, perforated, presence of fecolith) associated with local/generalized peritonitis and signs of septic shock</b> | 12/43 | <b>27.9</b> | 21/43 | <b>48.8</b> | Y | <b>Included</b>               |
|                                                                                           | <b>Complicated diverticulitis with local/generalized peritonitis and signs of septic shock (Hinchey III-IV)</b>                                                            | 11/43 | <b>25.6</b> | 24/43 | <b>55.8</b> | Y | <b>Included</b>               |
|                                                                                           | <b>Perianal abscess with septic shock</b>                                                                                                                                  | 12/43 | <b>27.9</b> | 21/43 | <b>48.8</b> | Y | <b>Included</b>               |
|                                                                                           | Infected necrotizing hemorrhagic pancreatitis with signs of septic shock                                                                                                   | 11/43 | <b>25.6</b> | 17/43 | <b>39.5</b> | N |                               |
|                                                                                           | Subdural hematoma                                                                                                                                                          | 15/43 | <b>34.9</b> | 15/43 | <b>34.9</b> | N | Cancelled                     |
| <b>YELLOW class-Within 6 hours from diagnosis-</b><br>stable patient with signs of sepsis | Anastomotic intestinal fistula/insufficiency in patient presenting sepsis signs                                                                                            | 15/43 | <b>34.9</b> | 16/43 | <b>37.2</b> | N | Modified definition; IV round |
|                                                                                           | Increasing intracranial pressure conditions                                                                                                                                | 12/43 | <b>27.9</b> | 19/43 | <b>44.2</b> | N | Cancelled                     |
|                                                                                           | <b>Complicated diverticulitis with sepsis (Hinchey III-IV)</b>                                                                                                             | 15/43 | <b>34.9</b> | 23/43 | <b>53.5</b> | Y | <b>Included</b>               |

|  |                                                                                                                           |       |             |       |             |   |                               |
|--|---------------------------------------------------------------------------------------------------------------------------|-------|-------------|-------|-------------|---|-------------------------------|
|  | <b>Complicated appendicitis (necrotic, appendicular abscess, perforated, presence of fecolith) associated with sepsis</b> | 16/43 | <b>37.2</b> | 21/43 | <b>48.8</b> | Y | <b>Included</b>               |
|  | Angioembolization of post splenic trauma pseudoaneurysm                                                                   | 10/43 | <b>23.3</b> | 14/43 | <b>32.6</b> | N | Cancelled                     |
|  | Foreign body with GUT obstruction (including endoscopy)                                                                   | 7/43  | <b>16.3</b> | 19/43 | <b>44.2</b> | N | Cancelled                     |
|  | Intraperitoneal bladder rupture                                                                                           | 11/43 | <b>25.6</b> | 18/43 | <b>41.9</b> | N | Cancelled                     |
|  | Kidney transplant                                                                                                         | 8/43  | <b>18.6</b> | 12/43 | <b>27.9</b> | N | Cancelled                     |
|  | <b>Perianal abscess with sepsis</b>                                                                                       | 23/43 | <b>53.5</b> | 13/43 | <b>30.2</b> | Y | <b>Included</b>               |
|  | <b>Urolithiasis with sepsis</b>                                                                                           | 21/43 | <b>48.8</b> | 13/43 | <b>30.2</b> | Y | <b>Included</b>               |
|  | Urolithiasis with high risk of kidney injury                                                                              | 12/43 | <b>27.9</b> | 19/43 | <b>44.2</b> | N | Modified definition; IV round |

|                                                                                                                                                                                                                           |                                                                |       |             |       |             |          |                    |
|---------------------------------------------------------------------------------------------------------------------------------------------------------------------------------------------------------------------------|----------------------------------------------------------------|-------|-------------|-------|-------------|----------|--------------------|
| <b>GREEN class-Within 12 hours from diagnosis-stable patient with moderate risk of presenting hemodynamic instability and organs failure; admitted in surgical department for prompt medical treatment and monitoring</b> | Incarcerated abdominal wall hernia with intestinal obstruction | 14/43 | <b>32.6</b> | 13/43 | <b>30.2</b> | N        | Modified; IV round |
|                                                                                                                                                                                                                           | Bilateral hydronephrosis                                       | 9/43  | <b>20.9</b> | 13/43 | <b>30.2</b> | N        | Cancelled          |
| <b>BLUE class-Within 24 or 48 hour from diagnosis; stable patient with low risk of presenting organs failure, admitted in surgical department for clinical monitoring and medical treatment</b>                           | Bowel/intestinal obstruction after medical treatment failure   | 12/43 | <b>27.9</b> | 18/43 | <b>41.9</b> | N        | modified; IV round |
|                                                                                                                                                                                                                           | Perianal abscess                                               | 15/43 | <b>34.9</b> | 16/43 | <b>37.2</b> | N        | Modified; IV round |
|                                                                                                                                                                                                                           | <b>Cholecystitis</b>                                           | 10/43 | <b>23.3</b> | 24/43 | <b>55.8</b> | <b>Y</b> | <b>Included</b>    |
|                                                                                                                                                                                                                           | Urinary fistula                                                | 5/43  | <b>11.6</b> | 16/43 | <b>37.2</b> | N        | Cancelled          |
|                                                                                                                                                                                                                           | Foreign body without intestinal obstruction                    | 7/43  | <b>16.3</b> | 23/43 | <b>53.5</b> | N        | Cancelled          |
|                                                                                                                                                                                                                           | Amputation due to osteomyelitis                                | 14/43 | <b>32.6</b> | 16/43 | <b>37.2</b> | N        | Cancelled          |

|  |                                                  |       |             |       |             |   |                    |
|--|--------------------------------------------------|-------|-------------|-------|-------------|---|--------------------|
|  | Acute appendicitis without peritoneal fluid      | 6/43  | <b>14</b>   | 22/43 | <b>51.2</b> | N | Modified; IV round |
|  | A-V fistula for hemodialysis                     | 10/43 | <b>23.3</b> | 12/43 | <b>27.9</b> | N | Cancelled          |
|  | Complicated bones fractures (displaced, complex) | 13/43 | <b>30.2</b> | 15/43 | <b>34.9</b> | N | Cancelled          |
|  | Maxillo facial fractures                         | 8/43  | <b>18.6</b> | 17/43 | <b>39.5</b> | N | Cancelled          |
